# Supplementary material for: Effects of Low versus High Glycemic Index Sugar-Sweetened Beverages on Postprandial Vasodilatation and Inactivity-Induced Impairment of Glucose Metabolism in Healthy Men
Source: MDPI journal article supplement (doi:10.3390/nu8120802), 2016-12-10
Supplement: s1 [file s1]

# Supplementary Materials: Effects of Low vs. High Glycemic Index Sugar-Sweetened Beverages on Postprandial Vasodilatation and Inactivity-Induced Impairment of Glucose Metabolism in Healthy Men

Judith Keller, Julia Kahlhöfer, Andreas Peter and Anja Bosy-Westphal

**Table S1.** Composition of the diet stratified by activity, low-GI and high-GI intervention.

|                          | Activity 1 <sup>1</sup> |      | Low Physical Activity<br>+ Low-GI <sup>2</sup> |      | Activity 2 <sup>1</sup> |      | Low Physical Activity<br>+ High-GI <sup>2</sup> |      |
|--------------------------|-------------------------|------|------------------------------------------------|------|-------------------------|------|-------------------------------------------------|------|
|                          | Mean                    | SD   | Mean                                           | SD   | Mean                    | SD   | Mean                                            | SD   |
| Energy intake (kJ/day)   | 13,769 *†               | 1850 | 12,819 *†                                      | 1261 | 13,729 *                | 1327 | 12,830 †                                        | 1084 |
| Carbohydrates (% energy) | 51 *                    | 2    | 55 †                                           | 3    | 50 *                    | 3    | 56 †                                            | 2    |
| Fat (% energy)           | 31 *†                   | 3    | 31 *†                                          | 1    | 33 *                    | 2    | 30 †                                            | 2    |
| Protein (% energy)       | 17 *                    | 1    | 14 †                                           | 1    | 17 *                    | 1    | 14 †                                            | 0    |
| Fiber (g/day)            | 34 *                    | 7    | 32 *                                           | 4    | 33 *                    | 7    | 32 *                                            | 3    |

<sup>1</sup> dietary intake averaged over 4 days where participants followed their habitual physical activity; <sup>2</sup> dietary intake averaged over the total inactive intervention period (7 days); RM-ANOVA: means not sharing a common superscript symbol (\*†) are different at  $p < 0.05$ ; GI: glycemic index; low-GI: isomaltulose; high-GI: mixture of 75% maltodextrin and 25% sucrose.
